# Supplementary material for: Self-Concept and Self-Esteem, Determinants of Greater Life Satisfaction in Mountain and Climbing Technicians and Athletes
Source: MDPI journal article supplement (doi:10.3390/ejihpe13070088), 2023-06-30
Supplement: s1 [file s1]

Supplementary Materials

# Self-Concept and Self-Esteem, Determinants of Greater Life Satisfaction in Mountain and Climbing Technicians and Athletes

## Supplementary Materials

Laura Martín-Talavera <sup>1</sup>, Óscar Gavín-Chocano <sup>2</sup>, Guillermo Sanz-Junoy <sup>1</sup> and David Molero <sup>2,\*</sup>

<sup>1</sup> Spanish Federation of Mountain Sports and Climbing, Floridablanca 84, 08015 Barcelona, Spain; secretaria.eeam@fedme.es (L.M.-T.); sistemagestion@fedme.es (G.S.-J.)

<sup>2</sup> Department of Pedagogy, University of Jaén, 23071 Jaén, Spain; ogavin@ujaen.es (Ó.G.-C.); dmolero@ujaen.es (D.M.)

\* Correspondence: dmolero@ujaen.es; Tel.: +34 953 213436

## Supplementary Materials

The assumptions of multicollinearity, homogeneity and homoscedasticity were analyzed to verify that the resulting distribution met the criteria of dependency between variables. Based on the data obtained with each of the instruments (see Table 1 to Table 3 of the Supplementary Materials), a Confirmatory Factor Analysis (CFA) was performed to verify the validity and internal structure of each item.

**Table 1.** Factor loadings; Rosenberg Self-esteem scale (Supplementary Materials).

| Factor      | Indicator | $\alpha$ | $\omega$ | Estimate | SE    | Z    | p     | $\beta$ | AVE  | CR   |
|-------------|-----------|----------|----------|----------|-------|------|-------|---------|------|------|
| Self-esteem | item 1    | .861     | .866     | .688     | .0148 | 46.4 | <.001 | .632    | .419 | .881 |
|             | item 2    | .851     | .857     | .795     | .0138 | 57.4 | <.001 | .740    |      |      |
|             | item 3    | .854     | .859     | .808     | .0146 | 55.4 | <.001 | .722    |      |      |
|             | item 4    | .877     | .880     | .366     | .0147 | 24.9 | <.001 | .368    |      |      |
|             | item 5    | .857     | .861     | .545     | .0112 | 48.7 | <.001 | .657    |      |      |
|             | item 6    | .863     | .867     | .706     | .0157 | 44.9 | <.001 | .614    |      |      |
|             | item 7    | .866     | .871     | .459     | .0126 | 36.3 | <.001 | .517    |      |      |
|             | item 8    | .857     | .862     | .588     | .0122 | 48.3 | <.001 | .653    |      |      |
|             | item 9    | .856     | .862     | .714     | .0138 | 51.9 | <.001 | .688    |      |      |
|             | item 10   | .849     | .854     | .787     | .0127 | 62.0 | <.001 | .782    |      |      |

Note. Rosenberg Self-esteem scale: SE: Standardized error; Z: Z-value in the estimate; p: p-value of Z estimate;  $\beta$ : Standardized estimate; AVE: Average Variance Extracted; CR: Composite Reliability.

*Rosenberg Self-esteem scale.* The factor loadings for the items of this scale presented an adequate fit [49],  $\chi^2/df = 3.639$ , with CFI = 0.981, SRMR = .063 and RMSEA = .077 (See Table 2 of the Supplementary Materials). The reliability of this scale was Cronbach's  $\alpha = .807$  and McDonald's  $\omega = .914$ .

**Table 2.** Factor loadings; Self-concept scale.

| Factor                 | Indicator | A    | $\omega$ | Estimate | SE      | Z    | p      | $\beta$ | AVE  | CR   |
|------------------------|-----------|------|----------|----------|---------|------|--------|---------|------|------|
| Emotional self-concept | item 1    | .781 | .787     | .375     | 0.01442 | 26.0 | < .001 | .402    | .485 | .785 |
|                        | item 2    | .737 | .747     | .598     | 0.01356 | 44.1 | < .001 | .636    |      |      |
|                        | item 3    | .749 | .760     | .516     | 0.01310 | 39.4 | < .001 | .577    |      |      |
|                        | item 4    | .725 | .732     | .658     | 0.01258 | 52.3 | < .001 | .727    |      |      |
|                        | item 5    | .755 | .761     | .613     | 0.01507 | 40.7 | < .001 | .595    |      |      |
|                        | item 6    | .727 | .733     | .643     | 0.01224 | 52.6 | < .001 | .729    |      |      |
| Physical self-concept  | item 7    | .711 | .725     | .398     | 0.01076 | 37.0 | < .001 | .555    | .443 | .756 |
|                        | item 8    | .738 | .746     | .443     | 0.01385 | 31.9 | < .001 | .497    |      |      |
|                        | item 9    | .734 | .741     | .468     | 0.01530 | 30.6 | < .001 | .473    |      |      |
|                        | item 10   | .690 | .702     | .568     | .01236  | 46.0 | < .001 | .666    |      |      |
|                        | item 11   | .685 | .698     | .528     | .01173  | 45.0 | < .001 | .654    |      |      |
|                        | item 12   | .683 | .702     | .559     | .01279  | 43.7 | < .001 | .646    |      |      |
| Social self-concept    | item 13   | .709 | .727     | .725     | .01219  | 59.5 | < .001 | .793    | .517 | .811 |
|                        | item 14   | .754 | .762     | .497     | .00946  | 52.6 | < .001 | .721    |      |      |
|                        | item 15   | .780 | .794     | .505     | .01109  | 45.6 | < .001 | .647    |      |      |
|                        | item 16   | .758 | .770     | .690     | .01334  | 51.7 | < .001 | .711    |      |      |

Note. Self-concept scale: SE: Standardized error; Z: Z-value in the estimate; p: p-value of Z estimate;  $\beta$ : Standardized estimate; AVE: Average Variance Extracted; CR: Composite Reliability.

*Self-concept scale* AF5 [12]. The factor loadings for the items of this scale also presented adequate fit values,  $\chi^2/df = 2.937$ , with CFI = 0.970, SRMR = .056 and RMSEA = .077 (see Table 3 of the Supplementary Materials). The reliability of this scale was emotional self-concept ( $\alpha = .779$  and  $\omega = .786$ ); physical self-concept ( $\alpha = .743$  and  $\omega = .754$ ); and social self-concept ( $\alpha = .802$  and  $\omega = .810$ ).

**Table 3.** Factor loadings; Life satisfaction scale.

| Factor            | Indicator | $\alpha$ | $\omega$ | Estimate | SE    | Z    | p      | $\beta$ | AVE  | CR   |
|-------------------|-----------|----------|----------|----------|-------|------|--------|---------|------|------|
| Life satisfaction | item 1    | .832     | .853     | 1.174    | .0120 | 98.1 | < .001 | .987    | .584 | .870 |
|                   | item 2    | .864     | .895     | 0.751    | .0145 | 51.6 | < .001 | .659    |      |      |
|                   | item 3    | .833     | .853     | 1.173    | .0120 | 98.1 | < .001 | .893    |      |      |
|                   | item 4    | .857     | .892     | 0.767    | .0148 | 52.0 | < .001 | .662    |      |      |
|                   | item 5    | .910     | .915     | 0.867    | .0218 | 39.7 | < .001 | .531    |      |      |

Note. Life satisfaction scale: SE: Standardized error; Z: Z-value in the estimate; p: p-value of Z estimate;  $\beta$ : Standardized estimate; AVE: Average Variance Extracted; CR: Composite Reliability.

*Life satisfaction scale.* In this third scale, the adjustment was also adjusted based on the values of the factor loadings of the items,  $\chi^2/df = 2.484$ , with CFI = 0.971, SRMR = .059 and RMSEA = .079. The reliability of this scale was Cronbach's  $\alpha = .884$  and McDonald's  $\omega = .903$ .
